# Supplementary material
Source: publisher figshare collection journal article supplement (https://frontiersin.figshare.com/ndownloader/files/27567620)
Supplement: Supplementary file 1 [file 27567620]

**Supplements**

**Table S3:** Correlations between the pre-school children’s ERF responses to the correct vs. incorrect morphological difference and the first grade children’s cognitive skills for real words (N = 27 pre-school children with and without risk, N = 27 first grade children with and without risk) and correlations between the pre-school children’s ERF responses to the correct vs. incorrect morphological difference and the first grade children’s cognitive skills for pseudowords (N = 23 pre-school children with and without risk, N = 23 first grade children with and without risk).

| **Real Words** | | | | | | | | | | | | |
| --- | --- | --- | --- | --- | --- | --- | --- | --- | --- | --- | --- | --- |
|  | **Block design_1gr** | **Vocabulary_1gr** | **Digit span_1gr** | **Repetition of nonsense words_1gr** | **Phonological processing_1gr** | **Sentence repetition_1gr** | **RAN objects_1gr** | **RAN letters_1gr** | **Dictation_1gr** | **Word list reading_1gr** | **Nonword list reading_1gr** | **Nonword text reading_1gr** |
| **0-300 ms_pre** | p=0.541 | 0.421 | 0.137 | 0.064 | **0.033*** | 0.681 | **0.007****  **(50ms)**  **0.015***  **(211ms)** | 0.136 | 0.342 | 0.403 | 0.314 | 0.088 |
| **300 - 700ms_pre** | **0.005****  **(527ms)** | **0.046***  **(646ms)** | 0.356 | 0.306 | 0.898 | 0.808 | **0.048***  **(540ms)** | 0.493 | 0.633 | 0.371 | 0.170 | 0.575 |
| **700 - 1100 ms_pre** | 0.421 | 0.342 | 0.820 | 0.238 | 0.091 | 0.151 | 0.066 | 0.353 | 0.185 | 0.170 | 0.071 | 0.372 |
| **Pseudowords** | | | | | | | | | | | | |
|  | **Block design_1gr** | **Vocabulary_1gr** | **Digit span_1gr** | **Repetition of nonsense words_1gr** | **Phonological processing_1gr** | **Sentence repetition_1gr** | **RAN objects_1gr** | **RAN letters_1gr** | **Dictation_1gr** | **Word list reading_1gr** | **Nonword list reading_1gr** | **Nonword text reading_1gr** |
| **0-300 ms_pre** | 0.125 | 0.177 | 0.276 | 0.147 | 0.300 | 0.390 | 0.086 | 0.746 | 0.429 | 0.237 | 0.268 | 0.378 |
| **300 - 700 ms_pre** | 0.220 | 0.080 | 0.400 | 0.239 | 0.541 | **0.023****  **(471ms)** | **0.028****  **(413ms)** | 0.298 | **0.029***  **(438ms)** | 0.187 | 0.133 | 0.379 |
| **700 - 1100 ms_pre** | **0.031****  **(870ms)**  0.042**  (999ms) | 0.152 | 0.878 | 0.188 | 0.570 | 0.570 | **0.013****  **(719ms)** | 0.423 | 0.120 | 0.166 | 0.412 | 0.626 |

Note: Bold are the significant correlations before FDR correction. No correlations remained significant after FDR correction.
